# Supplementary material
Source: publisher figshare collection journal article supplement (https://tandf.figshare.com/ndownloader/files/17544926)
Supplement: Supplementary file 1 [file 17544926]

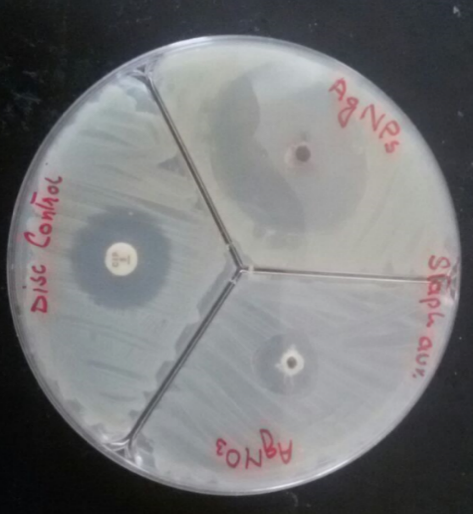

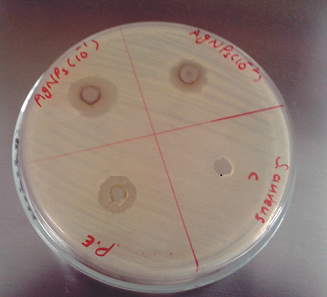

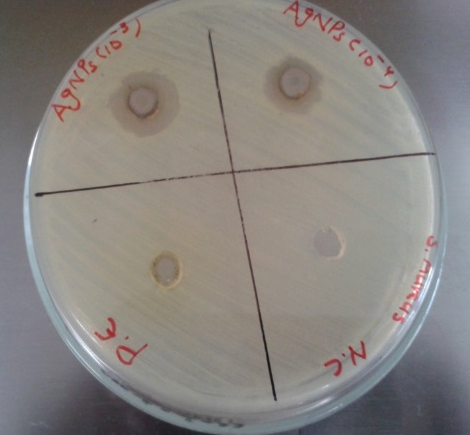


**AgNPs 10-4**

**Negative control**

**AgNPs 10-3**

**Plant Extract**

**Plant Extract**

**Negative control**

**AgNPs 10-2**

**AgNPs 10-1**

**Antibiotic Disc**

**AgNO3**

**AgNPs 1mg/ml**

**Fig. 1S.** Zones of inhibition by 50 µl of silver nanoparticles in different dilutions i.e. 1, 10-1, 10-2, 10-3, 10-4 mg/mL, plant extract (1 mg\ml), AgNO3 solution (1mM), and distilled water (negative control) against *Staphylococcus aureus*. Positive control = 10µg disc of ciprofloxacin.


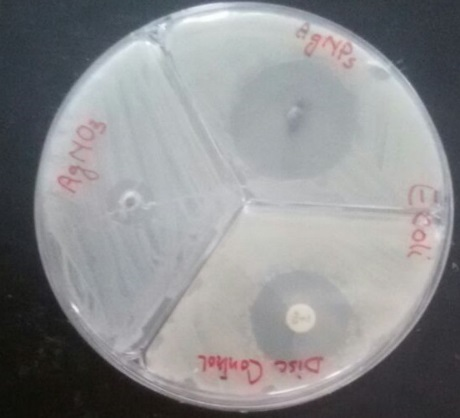

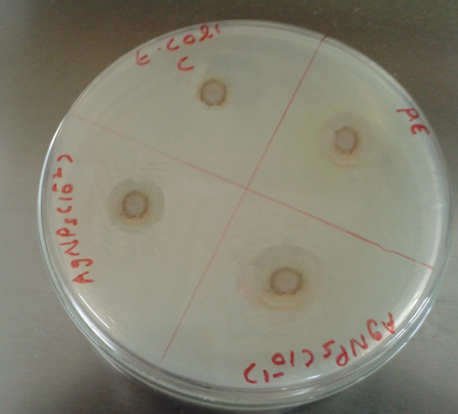

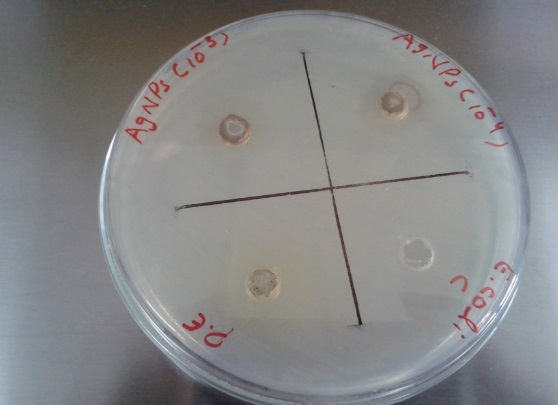


**Negative control**

**AgNPs 10-4**

**AgNPs 10-3**

**Plant Extract**

**Plant Extract**

**AgNPs 10-1**

**AgNPs 10-2**

**Negative control**

**Antibiotic Disc**

**AgNPs 1mg/ml**

**AgNO3**

**Fig. 2S**. Zones of inhibition by 50 µl of silver nanoparticles (AgNPs) in different dilutions i.e. 1, 10-1, 10-2, 10-3, 10-4 mg/mL, plant extract (1 mg\ml), AgNO3 solution (1mM), and distilled water (negative control) against *Escherichia coli*. Positive control = 10µg disc of ciprofloxacin.


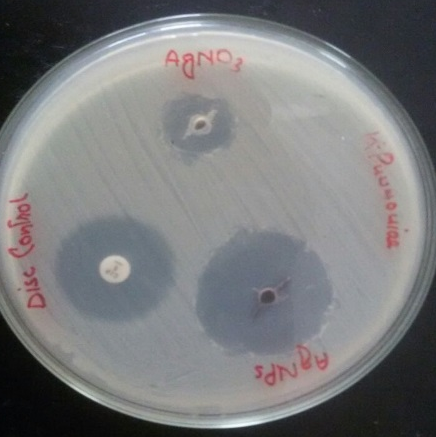

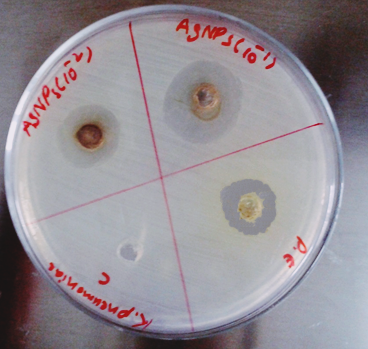

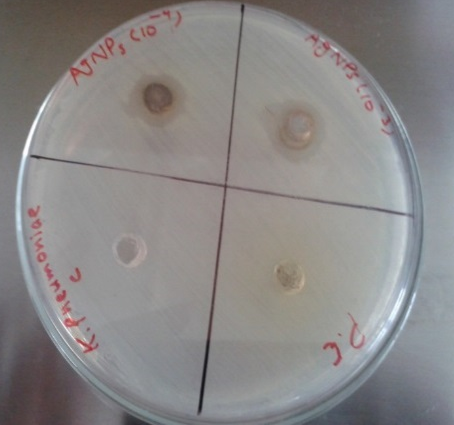


Antibiotic Disc

**Plant Extract**

**Negative control**

**AgNPs 10-3**

**AgNPs 10-4**

**AgNO3**

**AgNPs 1mg/ml**

**Negative control**

**Plant Extract**

**AgNPs 10-1**

**AgNPs 10-2**

**Fig. 3S.** Zones of inhibition by 50 µl of silver nanoparticles (AgNPs) in different dilutions i.e. 1, 10-1, 10-2, 10-3, 10-4 mg/mL, plant extract (1 mg\ml), AgNO3 solution (1mM), and distilled water (negative control) against *Klebsiella pneumoniae*. Positive control = 10µg disc of ciprofloxacin.


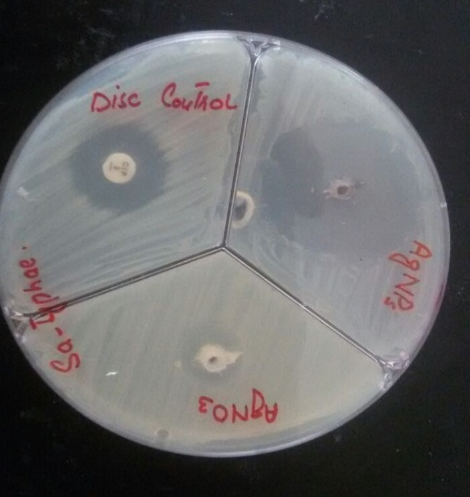

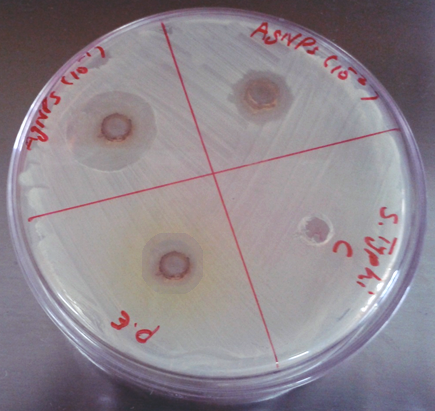

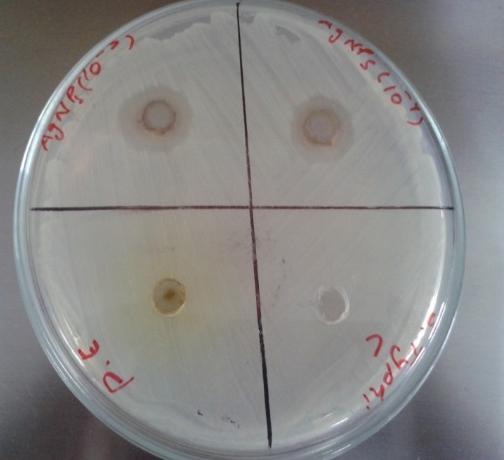


**Disc Control**

**Negative control**

**Plant Extract**

**AgNPs 10-4**

**AgNPs 10-3**

**Plant Extract**

**Negative control**

**AgNPs 10-2**

**AgNPs 10-1**

**AgNO3**

**AgNPs 1mg/ml**

**Fig. 4S**. Zones of inhibition by 50 µl of silver nanoparticles (AgNPs) in different dilutions i.e. 1, 10-1, 10-2, 10-3, 10-4 mg/mL, plant extract (1 mg\ml), AgNO3 solution (1mM), and distilled water (negative control) against Salmonella typhi. Positive control = 10µg disc of ciprofloxacin.
